# Supplementary material for: Host-influenced geochemical signature in the parasitic foraminifera Hyrrokkin sarcophaga
Source: Copernicus journal article supplement (doi:10.5194/bg-18-4733-2021), 2021-08-20
Supplement: Supplementary file [file bg-18-4733-2021-supplement-title-page.pdf › bg-18-4733-2021-supplement-title-page.pdf]

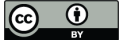

*Supplement of*

## **Host-influenced geochemical signature in the parasitic foraminifera *Hyrrokkin sarcophaga***

**Nicolai Schleinkofer et al.**

*Correspondence to:* Nicolai Schleinkofer (schleinkofer@em.uni-frankfurt.de)

- bg-18-4733-2021-supplement-title-page.pdf
- R\_Code.R
- S1\_Meigen\_Test.png
- S2\_Measurement\_Data.xlsx
- S3\_Fig.1.CR2
- S3\_Fig.1.tif

The copyright of individual parts of the supplement might differ from the article licence.
